# Supplementary material for: Key Landscapes for Conservation Land Cover and ChangeMonitoring Thematic and Validation Datasets for Sub-SaharanAfrica
Source: Copernicus journal article supplement (doi:10.5194/essd-2020-77), 2020-05-11
Supplement: Supplementary file [file essd-2020-77-RC3-supplement.pdf]

## **General comments**

The monitoring framework presented by Szantoi et al. is most welcomed, especially for African countries that may not readily have the necessary resources and tools, and / or have access to the required resources for developing such a monitoring framework. Such a monitoring framework is invaluable, and I anticipate interest and use by many organizations globally. This research is a significant contribution to the broader discipline of land cover mapping and monitoring.

## **Specific comments**

The manuscript is well written, coherent, and readily understandable, albeit several grammar and typographical transgressions.

Consider including a diagram illustrating the overall workflow.

Include relevant details regarding the change analysis. This is significant in the context of the high classification results achieved.

## **Technical corrections**

Title: check grammar; perhaps a colon should be placed after "Monitoring"?

Formatting of values and units in the Abstract.

Text, formatting (e.g. references), and typographical errors in the Introduction.

Inconsistency in formatting of values, e.g. L60.

Figure 1; indicate country names for easy reference.

Confusion regarding "200X", "201X", "plaus200X", and "plaus201X". Brief explain / clarify.

Define all acronyms the first time used, e.g. MMU, C-HSM.

Section 5.3: "i.e." should rather be "e.g."?
